1 **Programmed His bundle pacing - a novel maneuver for the diagnosis of His bundle**  
2 **capture**

3

4 Marek Jastrzębski, MD, PhD,<sup>1</sup> Paweł Moskal, MD,<sup>1</sup> Agnieszka Bednarek MD, PhD,<sup>1</sup>

5 Grzegorz Kielbasa, MD,<sup>1</sup> Pugazhendhi Vijayaraman, MD, FHRS,<sup>2</sup> Danuta Czarnecka, MD,

6 PhD<sup>1</sup>

7

8 (1) First Department of Cardiology, Interventional Electrophysiology and Hypertension,

9 Jagiellonian University, Medical College, Krakow, Poland

10 (2) Geisinger Heart Institute, Geisinger Commonwealth School of Medicine, Wilkes-Barre,  
11 PA, USA

12

13 Short title: Programmed His bundle pacing

14 The Journal Subject Term - Electrophysiology

15

16 Corresponding author:

17 Assoc. Prof. Marek Jastrzębski, MD, PhD

18 First Department of Cardiology,

19 Interventional Electrophysiology and Hypertension,

20 Jagiellonian University,

21 ul. Kopernika 17, 31-501 Kraków, Poland.

22 Phone: 048-502545228; FAX 048 - 124247320

23 Email: [mcjastrz@cyf-kr.edu.pl](mailto:mcjastrz@cyf-kr.edu.pl)

24

25 **Abstract (300)**

26 **Background**

27 During permanent non-selective (ns) His bundle (HB) pacing, it is crucial to confirm HB  
28 capture / exclude that only right ventricle (RV)-myocardial septal pacing is present. Because  
29 the effective refractory period (ERP) of the working myocardium is different than the ERP of  
30 the HB, we hypothesized that it should be possible to differentiate ns-HB capture from RV-  
31 myocardial capture using programmed extra-stimulus technique.

32 **Methods**

33 In consecutive patients during HB pacemaker implantation, programmed HB pacing was  
34 delivered from the screwed-in HB pacing lead. Premature beats were introduced at 10 ms  
35 steps during intrinsic rhythm and also after a drive train of 600 ms. The longest coupling  
36 interval that resulted in an abrupt change of QRS morphology was considered equal to ERP of  
37 HB or RV-myocardium.

38 **Results**

39 Programmed HB pacing was performed from 50 different sites in 32 patients. In 34/36 cases  
40 of ns-HB pacing, the RV-myocardial ERP was shorter than HB ERP ( $271.8 \pm 38$  ms vs  
41  $353.0 \pm 30$  ms,  $p < 0.0001$ ). Programmed HB pacing using a drive train resulted in a typical  
42 abrupt change of paced QRS morphology: from ns-HB to RV-myocardial QRS (34/36 cases)  
43 or to selective HB QRS (2/36 cases). Programmed HB pacing delivered during  
44 supraventricular rhythm resulted in obtaining selective HB QRS in 20/34 and RV-myocardial  
45 QRS in 14/34 of the ns-HB cases. In RV-myocardial only pacing cases (“false ns-HB pacing”,  
46  $n=14$ ), such responses were not observed - the QRS morphology remained stable. Therefore,  
47 the PHB pacing correctly diagnosed all ns-HB cases and all RV-myocardial pacing cases.

48 **Conclusions**

49 A novel maneuver for the diagnosis of HB capture, based on the differences in ERP between  
50 HB and myocardium was formulated, assessed and found as diagnostically valuable. This  
51 method is unique in enabling to visualize selective HB QRS in patients with otherwise  
52 obligatory ns-HB pacing (RV-myocardial capture threshold < HB capture threshold).

53

#### 54 **Key Words**

55 His bundle pacing; non-selective capture; refractoriness, effective refractory period,  
56 electrocardiogram

57

58

#### 59 **What this study adds**

60

61 ● Programmed His bundle pacing – a novel and straightforward method for  
62 unquestionable diagnosis of His bundle capture during non-selective pacing was  
63 developed and assessed.

64

65 ● A method for visualization of selective HB capture QRS in patients with obligatory  
66 non-selective pacing (myocardial capture threshold < His bundle capture threshold)  
67 was discovered and physiology behind it explained.

68

69

## 70 **Introduction**

71

72 The emergence of permanent His bundle (HB) pacing as a new, potentially alternative  
73 pacing option,<sup>1-5</sup> poses new challenges in ECG interpretation and electrocardiographic  
74 assessment of capture during device implantation. In patients with HB pacing, it is imperative  
75 that HB capture is confirmed both at the time of implantation and during follow-up. The  
76 diagnosis of HB capture is mostly based on paced QRS morphology assessment. However,  
77 during non-selective (ns)-HB pacing, paced QRS complex is a fusion between right  
78 ventricular (RV) myocardial capture and HB capture with variable contributions of the HB /  
79 RV depolarization wavefronts to the fused QRS. This makes the diagnosis of HB capture /  
80 exclusion of pure RV-myocardial pacing not always straightforward. Currently, the  
81 differentiation between ns-HB and RV-myocardial pacing is predominantly based on  
82 differences in capture thresholds between the HB and the RV myocardium. By increasing  
83 and decreasing pacing output, sudden changes of QRS morphology is observed reflecting  
84 HB/RV-myocardium capture/loss of capture.<sup>6</sup> This method has limitations and can fail when  
85 1.) the capture thresholds are similar, 2.) the change in QRS morphology is small/ambiguous,  
86 or 3.) the change in QRS morphology has a different cause than HB/RV capture/loss of  
87 capture. In clinical practice, it is quite challenging to determine if the HB is really paced or  
88 just pure RV-myocardial pacing with a relatively narrow, 'septal' QRS complex present.<sup>7</sup>

89 The aim of this study is to assess a novel method for confirmation of HB capture  
90 during non-selective pacing. We hypothesized that since effective refractory period (ERP) of  
91 HB is different from the ERP of the RV myocardium, it should be possible to differentiate  
92 pure myocardial capture from ns-HB capture using programmed extra-stimulus testing. When  
93 the RV-myocardial ERP is shorter than the HB ERP, the first extra-stimulus delivered at a  
94 coupling interval shorter than the HB ERP should result in a sudden QRS widening revealing

95 QRS morphology of pure myocardial capture; this finding would be diagnostic of non-  
96 selective HB pacing. In cases where the RV-myocardial ERP > HB ERP, the first extra-  
97 stimulus with a coupling interval shorter than RV-myocardial ERP should be followed by  
98 isoelectric interval and then selective HB paced QRS complex. Such a response would also be  
99 diagnostic of ns HB capture. If no QRS morphology change is observed throughout the whole  
100 coupling interval range despite reaching refractoriness / complete loss of capture, this would  
101 be indicative that only pure RV-myocardial capture was present.

102

### 103 **Methods**

104 In consecutive patients who underwent permanent HB pacemaker implantation,  
105 programmed HB pacing was performed and analyzed with the use of an electrophysiology  
106 system (Lab System Pro, Boston Scientific / Bard, USA). Pacing was delivered from the  
107 already deployed HB pacing lead (active helix, screw-in lead, model 3830, Medtronic, USA)  
108 with output set at 2 times the HB / RV capture threshold to ensure that both RV and HB were  
109 simultaneously captured (non-selective HB pacing, as recently defined).<sup>6</sup> A change in QRS  
110 morphology during decrease / increase in the pacing output served as the gold standard to  
111 identify pure RV-myocardial paced QRS morphology and non-selective HB paced QRS  
112 morphology. Premature beats were introduced during the intrinsic rhythm and also after an 8-  
113 beat basic drive train of 600 ms. The coupling interval was decreased at 10 ms steps, starting  
114 from 450 ms, until complete loss of capture. If the 3830 lead was deployed at a different sites  
115 in the same patient - programmed pacing was repeated from the new site.

116 QRS morphologies obtained during programmed pacing were compared with the QRS  
117 morphologies obtained during differential pacing output technique and analyzed according to  
118 the hypothesized diagnostic principle delineated in the introduction section.

119 The effective refractory period was defined as the longest coupling interval between  
120 the last stimulus of the drive train and the premature stimulus that failed to depolarize the  
121 tissue. Relative refractory period was defined as the longest coupling interval that resulted in  
122 prolonged conduction as evidenced by QRS prolongation or stimulus-QRS interval  
123 prolongation.

124 All patients gave written informed consent for participation in this study and the  
125 Institutional Bioethical Committee approved the study protocol.

126

## 127 **Results**

128 Consecutive patients (n=32), who underwent permanent HB pacemaker implantation  
129 were studied; clinical characteristics of these patients are presented in Table 1. Programmed  
130 HB pacing was performed 96 times from 50 different sites where the HB pacing lead was  
131 screwed-in during the procedure; 46 times during intrinsic supraventricular rhythm and 50  
132 times with the use of an 8-beat basic drive train of 600 ms. In vast majority of the studied  
133 patients (30/32), the RV-myocardial refractory period was shorter than the HB refractory  
134 period. Consequently, for the whole group, the average RV-myocardial refractory period was  
135 significantly shorter than the HB refractory period:  $271.8 \pm 38$  ms vs  $353.0 \pm 30$  ms,  $p < 0.0001$   
136 and  $306.4 \pm 37$  ms vs  $383.7 \pm 54$  ms,  $p < 0.0001$  when assessed with a drive train or with  
137 extrastimuli delivered during supraventricular rhythm, respectively. In all cases of ns-HB  
138 pacing (n = 36) when refractoriness was assessed with a drive train, there was a typical  
139 abrupt change of QRS morphology (QRS duration prolongation, rounding of R wave peak,  
140 appearance of notches, etc. – see Figure 1 and Supplementary Figure 1) occurring at a  
141 coupling interval range close to the expected refractoriness of the HB. The RV-myocardial  
142 paced QRS morphology was then maintained until the complete loss of capture at the RV  
143 myocardial refractory period. In all cases, this broader QRS morphology was identical to the

144 RV myocardial QRS morphology obtained with differential output pacing maneuver in a  
145 particular patient (compare Supplementary Figure 1 and Supplementary Figure 2). This  
146 typical QRS morphology change was in some cases preceded by 1-2 slightly broader ns-HB  
147 QRS complexes likely due to the decremental conduction in the HB during the relative  
148 refractory period and hence a smaller contribution of the HB capture to the fused QRS  
149 complex – see Supplementary Figure 1.

150 In two patients, instead of RV-myocardial QRS a selective HB QRS appeared with  
151 short coupled extrastimuli (RV-myocardial ERP > HB ERP). In stark contrast to the response  
152 observed in ns-HB pacing cases, in all cases of pure RV myocardial capture (‘false ns-HB  
153 pacing’, n = 14) there was no change of QRS morphology throughout the whole coupling  
154 interval range - see Figure 2.

155 Surprisingly, extra-stimuli delivered during native supraventricular rhythm resulted in  
156 the majority of cases of ns-HB pacing (20 out of 34) in a ‘reversed response’. Short-coupled  
157 extrastimuli brought out pure selective HB capture QRS morphology (Figure 2) rather than  
158 pure RV-myocardial morphology. This phenomenon of sudden loss of RV-myocardial  
159 capture was present despite the fact that the RV refractory time was shorter than the HB  
160 refractory time and despite pacing with output 2x higher than the RV-myocardial capture  
161 threshold. In 11/34 cases, there was no ‘reversed response’ but the same response as during  
162 programmed pacing with the drive train, i.e. appearance of RV-myocardial QRS morphology  
163 when HB refractoriness was met and in 3/34 cases ns-HB QRS morphology was maintained  
164 until loss of capture (simultaneous loss of capture of the HB and RV-myocardium).

165 In summary, programmed HB pacing provided a diagnostically correct response in  
166 every studied patient, both when premature beats were introduced during intrinsic rhythm and  
167 when an 8-beat basic drive train of 600 ms was used. Representative examples of responses

168 during programmed HB pacing are presented in Figures 1-3 and Supplementary Figures 1 and  
169 3.

170

## 171 **Discussion**

172 The major finding of the current study is that the programmed HB pacing maneuver is  
173 able to reliably differentiate non-selective HB capture from RV-myocardial pacing.  
174 Diagnostically correct response was observed in all cases of ns-HB pacing, because ample  
175 difference in refractory times between HB and RV myocardium was present in every studied  
176 patient. Classic studies on the refractoriness of the human heart provide concordant data with  
177 regard to the difference in refractory times between the HB and RV myocardium.<sup>8</sup> It seems  
178 that this electrophysiological characteristics of the heart can be relied upon - for diagnostic  
179 purpose – in patients with permanent HB pacing.

180 The second important and novel finding of this study is that the programmed HB  
181 pacing method is uniquely capable of visualizing selective HB QRS morphology in cases  
182 where this seemed impossible, i.e. when RV-myocardial capture threshold is lower than the  
183 HB capture threshold leading to obligatory RV capture during HB pacing. We believe that  
184 this interesting phenomenon of bringing out selective HB QRS complex can be explained by  
185 the altered activation sequence when premature stimulus is delivered after slower native  
186 supraventricular rhythm vs. after the faster basic drive train paced QRS. This is explained  
187 graphically on Figure 4. Briefly, when an extra-stimulus is delivered during supraventricular  
188 rhythm, the RV coupling interval is shorter than HB coupling interval. This is because HB is  
189 pre-excited in relation to the local ventricular myocardium near the HB pacing lead. The HB  
190 activation starts approximately 100 ms before the RV myocardium because of the sum of HV  
191 interval (50 ms) and the time necessary for the depolarization to reach the most basal part of  
192 the interventricular septum near the HB (50 ms). The average difference in refractory periods  
193 between HB and RV myocardium is about 80 ms, therefore, in most patients, this will result



194 in a 20 ms longer excitable period of the HB than RV leading to selective HB QRS complexes  
195 at the two last coupling intervals before the ERP of the HB is reached. In contrast, during  
196 basic drive train both the HB and the local RV myocardium are depolarized simultaneously  
197 and the refractory periods of both structures begin simultaneously rather than sequentially,  
198 and selective HB capture is not observed since HB effective refractory period is almost  
199 always longer than RV effective refractory period.

200 The two tested methods of programmed HB pacing seem complementary to visualize  
201 both components of the fused ns-HB QRS complex. While both methods provided diagnostic  
202 response in our cohort, these responses were different. Extra-stimuli delivered after a drive  
203 train best expose the difference in refractory periods between HB and RV myocardium and  
204 unmask pure RV-myocardial QRS. However, the responses observed when extra-stimuli are  
205 delivered during supraventricular rhythm seemed more diagnostically clear-cut as the  
206 selective HB QRS is diagnostically unmistakable.

207

#### 208 Clinical translation

209 In our experience, during the last 4 years and over 240 cases of permanent HB pacing  
210 device implantation, we have encountered several situations where the paced QRS  
211 morphology was ambiguous and either there was no change of QRS morphology with  
212 differential output method or the change was inconclusive and we were searching for an  
213 alternative diagnostic option. Without such a method, the operator faced a dilemma: should  
214 the lead be repositioned or was the acute endpoint of HB pacemaker implantation procedure  
215 already achieved? This problem is even more pronounced during follow-up when pacing from  
216 other sites for comparison is unavailable and the decision to schedule the patient for HB lead  
217 revision is much more serious. We believe that the programmed HB pacing maneuver and the  
218 principle behind it are the needed solution to this problem. We found that programmed HB

219 pacing is useful for making the diagnosis of HB capture in ambiguous cases and for providing  
220 additional evidence of HB capture in the remaining obligatory ns-HB pacing cases by  
221 visualizing selective capture QRS. It is worth to note that the diagnostic value of a selective  
222 HB paced QRS exceeds that of any ns-HB paced QRS even when QRS morphology change is  
223 observed with differential pacing output technique. Programmed HB pacing assures the  
224 operator that the acute endpoint of the procedure was unquestionably achieved.

225         Programmed HB pacing method is not limited to use in the electrophysiology  
226 laboratory only, as it can be delivered from an implanted pacemaker as well, using the 'non-  
227 invasive programmed stimulation' option, that is available in most pacemakers. Perhaps it is  
228 not necessary to perform pacing with the whole coupling interval range. It seems that it is  
229 adequate to introduce a single extra-stimulus at a single coupling interval of 300 ms to obtain  
230 a straightforward diagnostic response (Supplementary Figure 3) in the majority of cases. We  
231 found that at this coupling interval HB is almost always refractory, while myocardium is  
232 almost always excitable. Moreover, the difference in ERP between the HB and RV  
233 myocardium can be exploited in a simplified manner. It is enough to temporarily program  
234 HB pacemaker to an asynchronous VOO mode with the pacing rate slightly slower than the  
235 native ventricular rate and to observe the paced QRS morphology behavior. Asynchronous  
236 pacing results in scanning of diastole with pacing stimuli, and it takes a short time to observe  
237 a diagnostic response: either broader RV-myocardial or narrower selective HB QRS  
238 complexes appear with short coupled stimuli (Figures 5 and 6).

239

#### 240 Other methods to differentiate ns-HB capture from septal myocardial capture

241         We are not aware of any validated method for differentiation between ns-HB capture  
242 and RV myocardial capture other than assessing changes in retrograde conduction.<sup>7,9</sup>  
243 Although we did not assess VA conduction times in this study, this method has several

244 limitations. First, in the most common scenario when an additional method is needed, i.e. no  
245 QRS morphology change with differential output due to similar capture thresholds, there also  
246 would be no change in VA conduction time. Second, in our experience, the majority of  
247 patients undergoing HB pacemaker implantation either have permanent atrial fibrillation or no  
248 1:1 VA conduction, which precludes application of this method, as well.  
249

250 Limitations of the study

251 A relatively small number of patients were included, however, the observed responses  
252 were absolutely repeatable and consistent in the whole studied group, and the physiological  
253 explanation behind the observed responses is theoretically sound. We believe that the studied  
254 cohort was large enough to provide the necessary ‘proof of concept’ for the programmed HB  
255 pacing maneuver while ‘real life’ clinical usefulness needs to be shown in a bigger cohort.  
256 Based on our observations, the incidence of identical RV and HB capture thresholds in  
257 patients with ns-HB pacing is less than 10%. This was not implicitly assessed in this cohort.

258 Potential pitfall in interpretation of responses to programmed HB pacing that became  
259 apparent during the current study is the presence of QRS widening and HV interval  
260 prolongation when the RV and the HB relative refractory periods are encroached upon with  
261 extra-stimuli, respectively. These phenomena can be appreciated when analyzing QRS  
262 complexes captured during relative refractory periods in Figures 2-3 and Supplementary  
263 Figure 1. Prolongation of QRS complexes during relative RV myocardial refractory period  
264 should not be mistaken as prolongation due to the loss of HB capture. Features that can help  
265 in distinguishing between these two phenomena are as follows: 1.) QRS prolongation related  
266 to the relative refractory period is usually more gradual, subtle and present just before the  
267 effective refractory period i.e. 10 – 30 ms before the loss of capture; 2.) it is present at  
268 coupling intervals below the typical HB refractory times, i.e. < 300 ms, usually close to 260  
269 ms 3.) an already broad and notched QRS, usually > 150 ms, changes into even more broader  
270 QRS.

271 The prolongation of the HV interval that occurs at coupling intervals just before the  
272 coupling interval with the loss of HB capture is responsible for QRS morphology change  
273 occasionally, somewhat visually less evident than expected (compare Figure 1 vs  
274 Supplementary Figure 1). HV interval prolongation results in the diminishing contribution of

275 the HB capture to the fused QRS. Such a gradual QRS broadening at coupling intervals just  
276 before the coupling interval with complete loss of HB capture might causes difficulties in  
277 determining at exactly what coupling interval HB capture was lost. Analysis of all 12-ECG  
278 leads overcomes this problem, as in some leads change in QRS morphology/axis is more  
279 abrupt/evident (note lead III in Supplementary Figure 1 and 2) than in others.

280 Programmed ventricular stimulation is time-consuming and has the potential to  
281 induce malignant ventricular arrhythmias and this might be seen as a practical limitation of  
282 the current maneuver. However, programmed stimulation is considered safe when performed  
283 in an electrophysiology laboratory and induction of ventricular tachyarrhythmia with a single  
284 extra-stimulus is "extremely uncommon".<sup>8</sup> During our study, we did not observe induction of  
285 any ventricular arrhythmias (couplets or non-sustained ventricular tachycardia). Perhaps  
286 programmed HB pacing likely is less arrhythmogenic than programmed ventricular  
287 stimulation.

288 The same applies to the proposed temporary asynchronous ventricular pacing - it  
289 might be seen as proarrhythmic. However, asynchronous ventricular pacing is an officially  
290 recommended method used during pacemaker follow-up and even for remote telephone  
291 monitoring – apparently without negative consequences.

292

### 293 Conclusions

294 A novel maneuver for the diagnosis of HB capture, based on the differences in ERP  
295 between myocardium and HB was formulated, assessed and explained. We believe that this  
296 diagnostic method increases knowledge of HB electrophysiology, provides a diagnostic  
297 solution in ambiguous paced QRS morphologies, and contributes to a more rigorous  
298 definition of the procedure endpoint. A larger study is necessary to fully evaluate the  
299 diagnostic value and clinical utility of this maneuver.

300 **Funding**

301 None

302

303 **Disclosures**

304 P. Vijayaraman:

305 Research, Fellowship support, Speaker, Consultant - Medtronic

306 Consultant - Abbott, Biotronik and Boston Scientific

307 Speaker - Merritt medical.

308

309

310 **References**

311

312 1. Sharma PS, Dandamudi G, Naperkowski A, Oren JW, Storm RH, Ellenbogen KA,  
313 Vijayaraman P. Permanent His-bundle pacing is feasible, safe, and superior to right  
314 ventricular pacing in routine clinical practice. *Heart Rhythm* 2015; 12:305-312.

315 2. Abdelrahman M, Subzposh FA, Beer D, Durr B, Naperkowski A, Sun H, Oren JW,  
316 Dandamudi G, Vijayaraman P. Clinical Outcomes of His Bundle Pacing Compared to  
317 Right Ventricular Pacing. *J Am Coll Cardiol* 2018; 71:2319-2330.

318 3. Jastrzebski M, Moskal P, Bednarek A, Kielbasa G, Czarnecka D. His-bundle pacing as  
319 a standard approach in patients with permanent atrial fibrillation and bradycardia.  
320 *Pacing Clin Electrophysiol* 2018.

321 4. Dandamudi G, Vijayaraman P. How to perform permanent His bundle pacing in  
322 routine clinical practice. *Heart Rhythm* 2016; 13:1362-1366.

323 5. Vijayaraman P, Chung MK, Dandamudi G, Upadhyay GA, Krishnan K, Crossley G,  
324 Bova Campbell K, Lee BK, Refaat MM, Saksena S, Fisher JD, Lakkireddy D; His  
325 Bundle Pacing. *J Am Coll Cardiol* 2018; 72:927-947.

326 6. Vijayaraman P, Dandamudi G, Zanon F, Sharma PS, Tung R, Huang W, Koneru J,  
327 Tada H, Ellenbogen KA, Lustgarten DL. Permanent His bundle pacing:  
328 Recommendations from a Multicenter His Bundle Pacing Collaborative Working  
329 Group for standardization of definitions, implant measurements, and follow-up. *Heart*  
330 *Rhythm* 2018; 15:460-468.

331

332 7. Worsnick SA, Naperkowski A, Subzposh FA, Dandamudi G, Vijayaraman P.  
333 Validation of Non-Selective His Bundle Pacing Utilizing Retrograde Conduction.  
334 *Heart Rhythm* 2016;13:S264

335

336 8. Josephson M. Clinical Cardiac Electrophysiology. Philadelphia, Lippincott, 2002; 63-  
337 64.

338 9. Hirao K, Otomo K, Wang X, Beckman KJ, McClelland JH, Widman L Gonzalez MD,  
339 Arruda M, Nakagawa H, Lazzara R, Jackman WM. Para-Hisian pacing. A new  
340 method for differentiating retrograde conduction over an accessory AV pathway from  
341 conduction over the AV node. *Circulation* 1996; 94:1027-1035.

342 **Tables**

343 **Table 1.** Basic clinical characteristics of the studied group (n = 32)

|                                        |            |
|----------------------------------------|------------|
| Age [years]                            | 75.1±12.6  |
| Male gender                            | 21 (65.6%) |
| Pacing indication:                     |            |
| • Sick sinus syndrome                  | 3 (9.4%)   |
| • Atrioventricular block               | 8 (25.0%)  |
| • Atrial fibrillation with bradycardia | 13 (40.6%) |
| • Heart failure                        | 8 (25.0%)  |
| Procedure result:                      |            |
| • HB pacing                            | 20 (62.5%) |
| • Myocardial / deep septal pacing      | 12 (37.5%) |
| Comorbidities:                         |            |
| • Heart failure                        | 15 (46.9%) |
| • Coronary heart disease               | 11 (34.4%) |
| • Diabetes mellitus                    | 13 (40.6%) |
| • Hypertension                         | 25 (78.1%) |
| • Severe valvular disease              | 4 (12.5%)  |
| LV ejection fraction [%]               | 49.3±11.2  |
| Native QRS duration [ms]               | 123±25.4   |
| HV interval [ms]                       | 50.2±9.6   |

344 HB – His bundle, ns – non-selective, LV – left ventricular, HV – His-ventricle

345



346 **Figures**

347

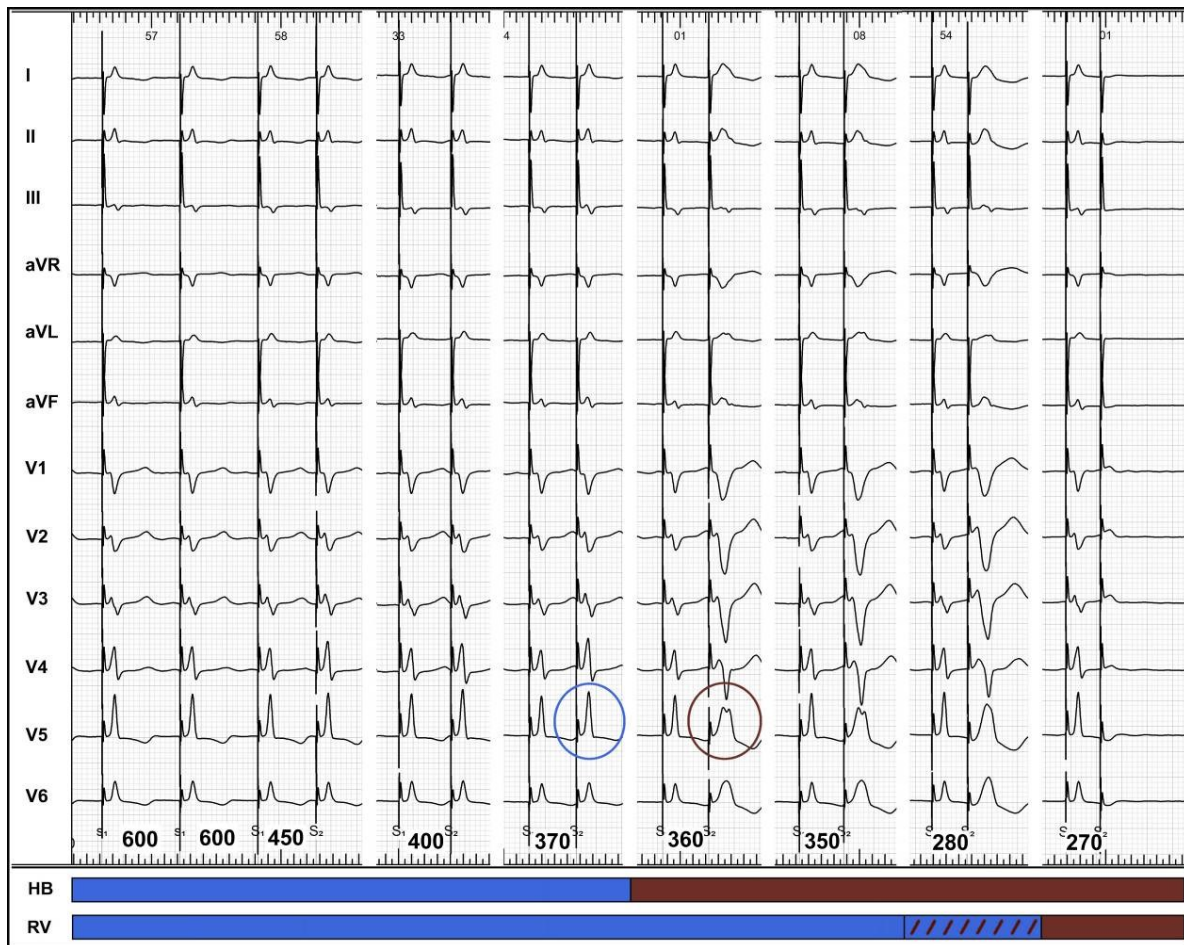

348

349 **Figure 1.** Programmed HB pacing: premature extra-stimuli are delivered after a drive train of  
350 600 ms at progressively shorter coupling intervals. At coupling interval of 370 ns-HB, QRS  
351 morphology is still present (blue circle) while at a 10 ms shorter coupling interval of 360 ms,  
352 HB is found refractory and pure RV-myocardial morphology is unmasked (burgundy circle).  
353 At coupling intervals of 450 – 370 ms, only ns-HB QRS morphology is present (HB effective  
354 refractory period of 360 ms). At coupling intervals of 360-280 ms, only RV-myocardial QRS  
355 morphology is present (RV myocardial effective refractory period of 270 ms). During relative  
356 refractory period of the RV myocardium (280-270ms), some further QRS prolongation can be  
357 observed. The blue bar corresponds to HB / RV capture (excitable period), the dashed bar to



358 capture with decremental conduction (relative refractory period), and the burgundy bar to loss  
359 of capture (effective refractory period).

360

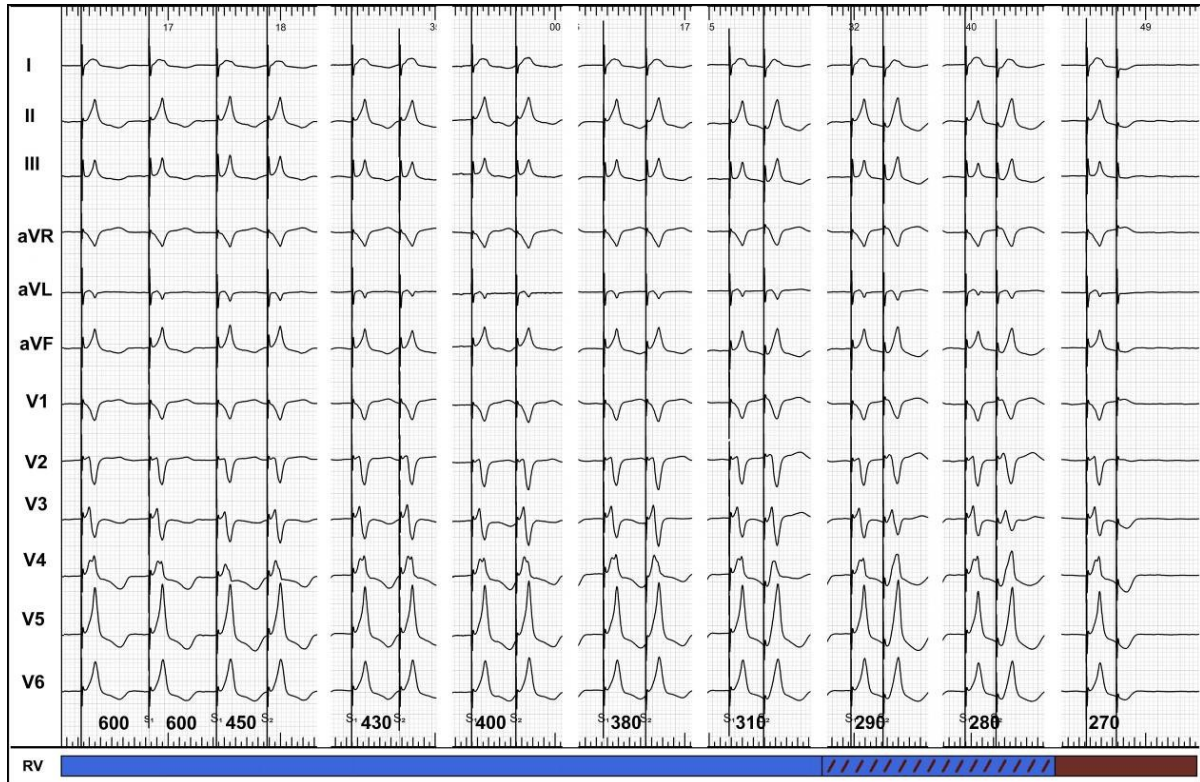

361

362 **Figure 2.** Programmed HB pacing during RV-myocardial capture only ('false ns-HB  
363 pacing'): stable QRS morphology is present until RV-myocardial effective refractory period  
364 and loss of capture that occurs within the usual coupling interval values (280-250 ms).

365

366

367

368

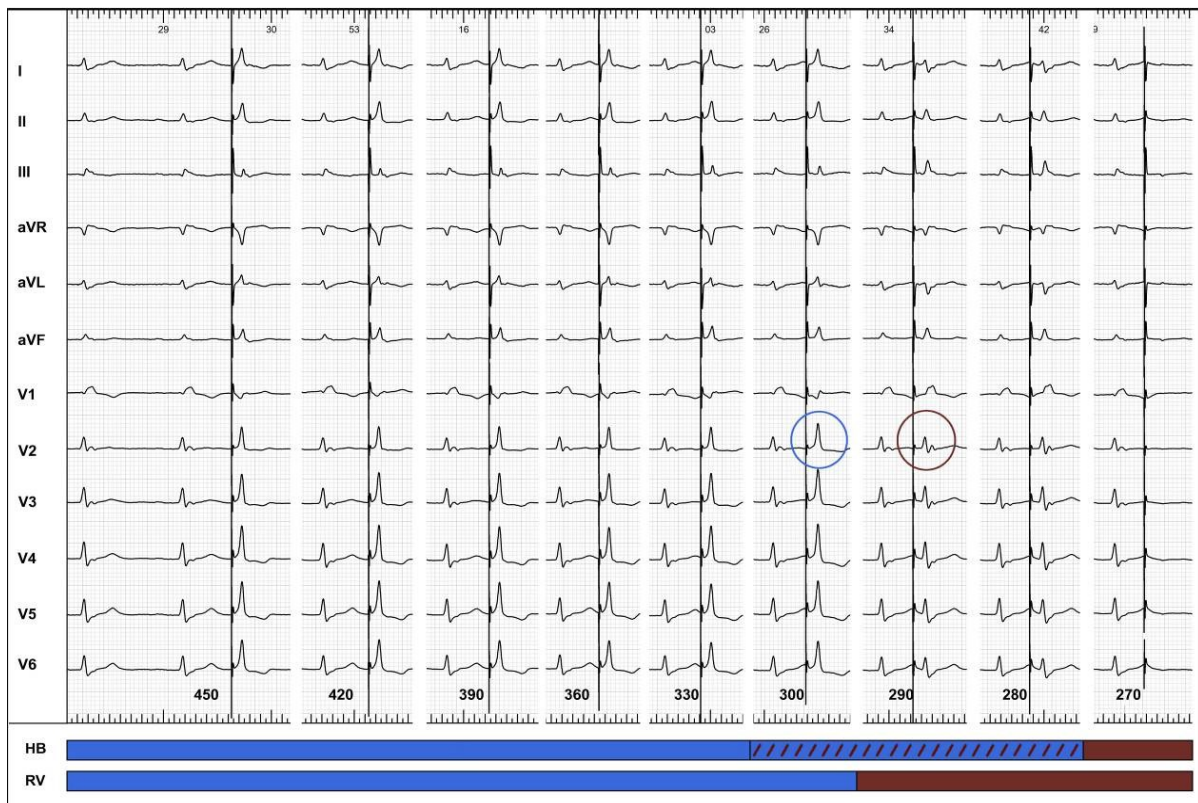

369

370 **Figure 3.** Programmed HB pacing during native supraventricular rhythm. Blue and burgundy  
371 circles denote the sudden change of QRS morphology from ns-HB QRS morphology to  
372 selective-HB QRS morphology. At coupling intervals of 450 – 300 ms, only ns-HB QRS  
373 morphology is present. At coupling intervals of 290-270 ms, only selective-HB QRS  
374 morphology is present. This reflects RV refractory period of 290 ms and HB refractory  
375 period of 370 ms (270 ms + 100 ms) - for explanation, see text and Figure 4. Note that at the  
376 coupling interval of 300 ms, there is some QRS prolongation, most likely due to the  
377 diminished contribution of the HB depolarization wavefront to the fused ns-HB QRS. This is  
378 most likely caused by the encroachment on the relative refractory period of the HB and hence  
379 the HV interval prolongation. Long stimulus-V interval present with the coupling interval of  
380 290 ms and further prolongation with subsequent extra-stimulus (280 ms) supports such an  
381 explanation. The blue bar corresponds to HB / RV capture, the dashed bar to capture with

382 decremental conduction (relative refractory period), and the burgundy bar to loss of capture  
383 (effective refractory period).

384

385

386

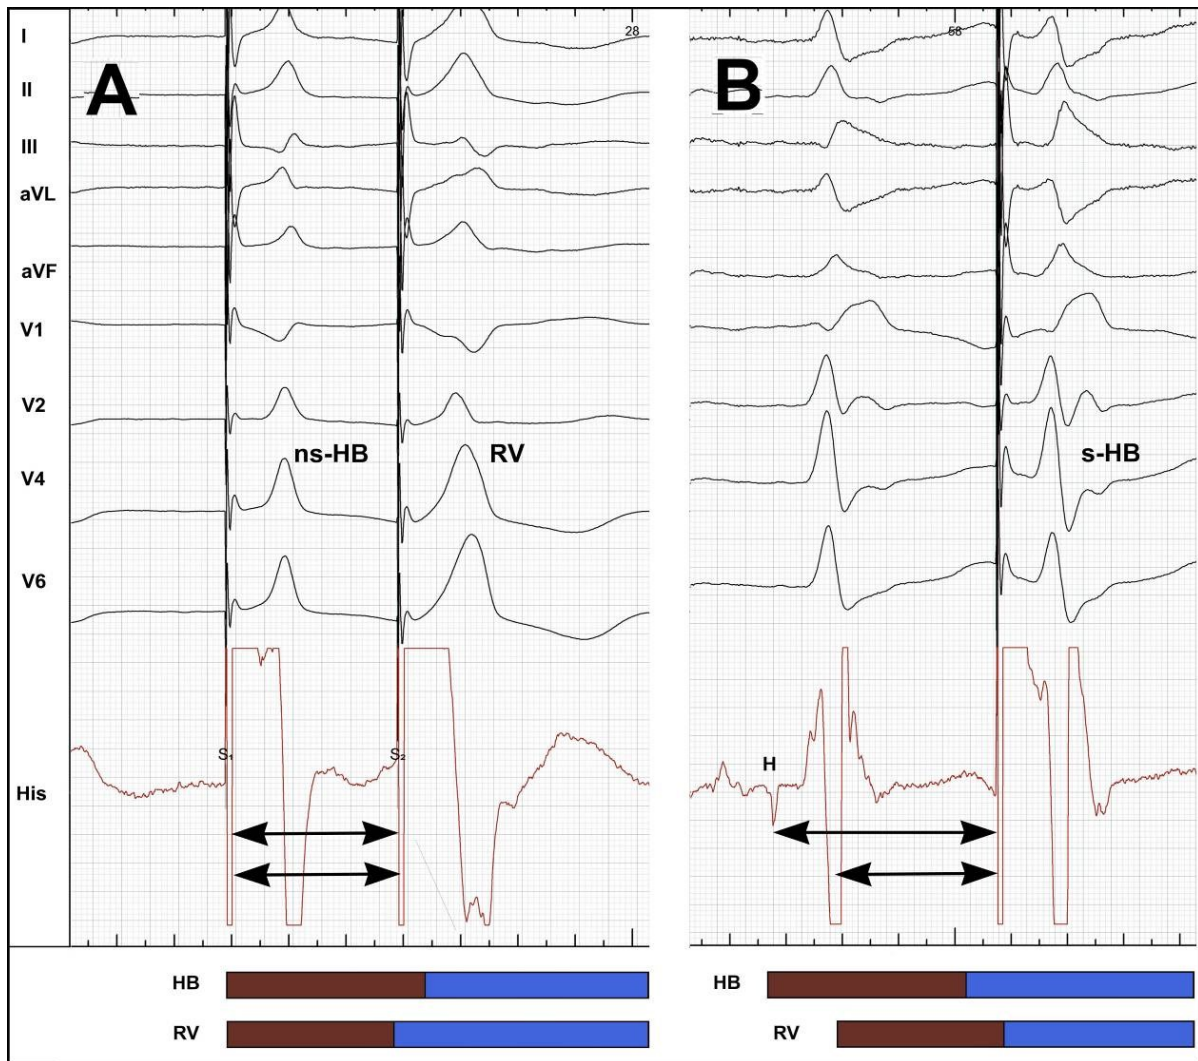

387

388 **Figure 4.** A “reversed response” during programmed HB pacing enables to visualize both  
389 components of the fused ns-HB QRS complex. In the same patient with a ns-HB pacing, an  
390 extra-stimulus is delivered at a coupling interval of 300 ms, first after a drive train (panel A)  
391 and then during a supraventricular rhythm (panel B). After a 600 ms drive train, the extra-  
392 stimulus results in a sudden QRS broadening in comparison to the preceding ns-HB QRS  
393 because of RV-myocardial capture only. During the supraventricular rhythm, an extra-  
394 stimulus with identical coupling interval unexpectedly resulted in a selective HB capture and  
395 QRS similar to the native supraventricular rhythm. This can be explained by a different  
396 activation sequence. During supraventricular rhythm, HB is activated 100 ms before the



397 ventricular myocardium near the HB pacing lead. Consequently, despite a longer refractory  
398 period (burgundy bar), HB is excitable (blue bar), while RV myocardium is not. During the  
399 600ms drive train of ns-HB pacing, both the HB and the local RV myocardium are  
400 depolarized at the same time and HB is not excitable due to the longer effective refractory  
401 period. Arrows mark the extent of the true coupling intervals for the HB and the RV.

402 HB – His bundle, s-HB – selective HB, ns-HB – non-selective HB, His – endocardial signals  
403 from the screwed-in HB pacing lead, H – HB potential, RV – right ventricle

404

405

406

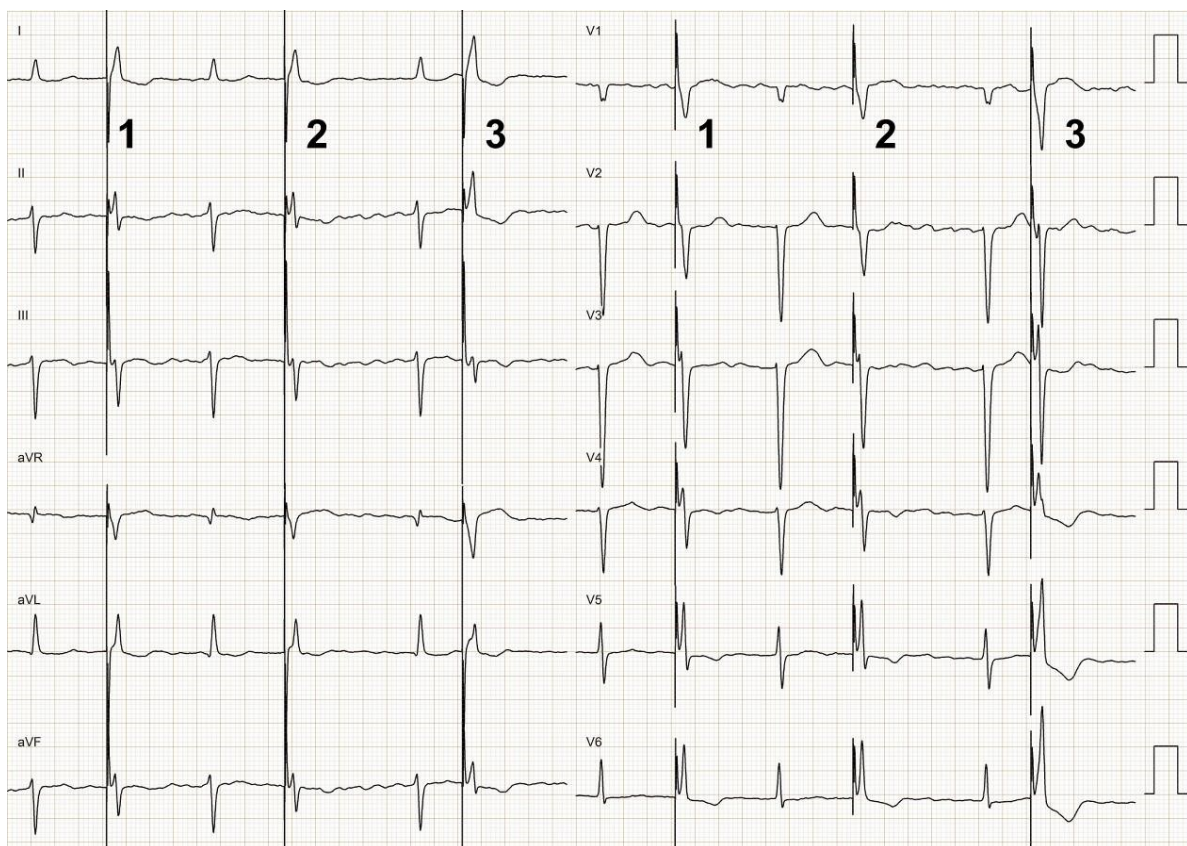

407

408 **Figure 5.** Asynchronous ns-HB pacing in VOO mode results in scanning of diastole with  
409 pacing stimuli. The first two stimuli result in ns-HB capture while the third occurs when the

410 HB is refractory and depolarizes only the RV myocardium (note QRS axis change and QRS  
411 broadening) – thus providing a diagnostic response.

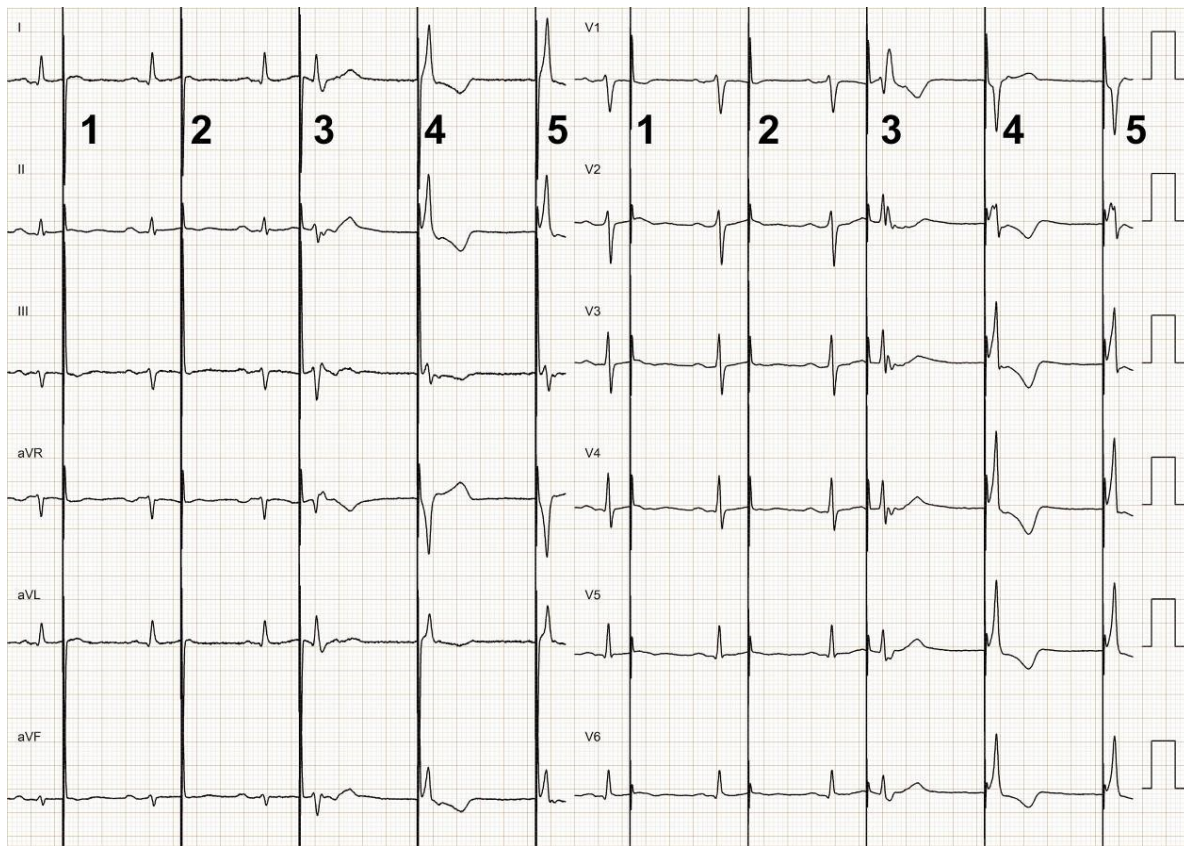

412

413 **Figure 6.** Asynchronous ns-HB pacing in VOO mode results in scanning of diastole with  
414 pacing stimuli. The first two stimuli fall on the effective refractory period of the HB and RV  
415 myocardium and result in non-capture, while the third stimulus occurs when the RV  
416 myocardium is refractory and propagates only via HB resulting in the short isoelectric interval  
417 and supraventricular QRS morphology with right bundle branch aberration (Ashman  
418 phenomenon). Stimuli 5 and 6 result in ns-HB capture since with a longer coupling, both the  
419 HB and RV myocardium are excitable.

420

421

422

423

424

425

426

427 Supplementary Figures

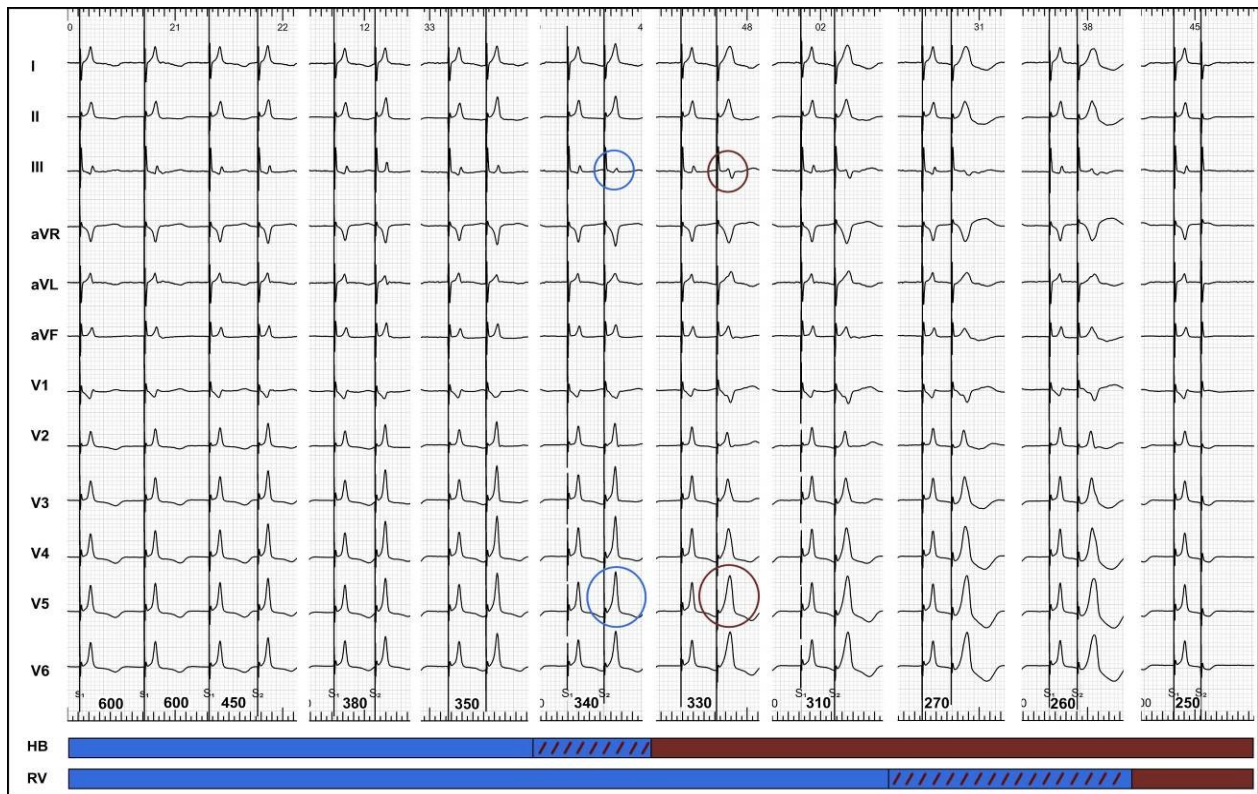

428

429 Supplementary Figure 1. Programmed HB pacing: premature extra-stimuli are delivered after  
430 a drive train of 600 ms at progressively shorter coupling intervals. Blue and burgundy circles  
431 denote the sudden change of QRS morphology from ns-HB QRS morphology to RV-  
432 myocardial QRS morphology. At coupling intervals of 450 – 340 ms, only ns-HB QRS  
433 morphology is present (HB effective refractory period of 330 ms). At coupling intervals of  
434 330-250 ms, only RV-myocardial QRS morphology is present (RV myocardium effective  
435 refractory period of 250 ms). During relative refractory period of the HB (340-330 ms), there  
436 is already some QRS prolongation due to the HV interval prolongation and hence, a smaller  
437 contribution of the HB depolarization wavefront to the fused ns-HB QRS complex. During  
438 the relative refractory period of the RV myocardium (270-250ms), some QRS widening can  
439 also be observed. An ECG of the same patient is also presented on Supplementary Figure 1 –  
440 documenting identical QRS morphology during loss of HB capture with differential pacing  
441 output method. The blue bar corresponds to HB / RV capture (excitable period), the dashed



442 bar to capture with decremental conduction (relative refractory period), and the burgundy bar  
443 to loss of capture (effective refractory period).

444

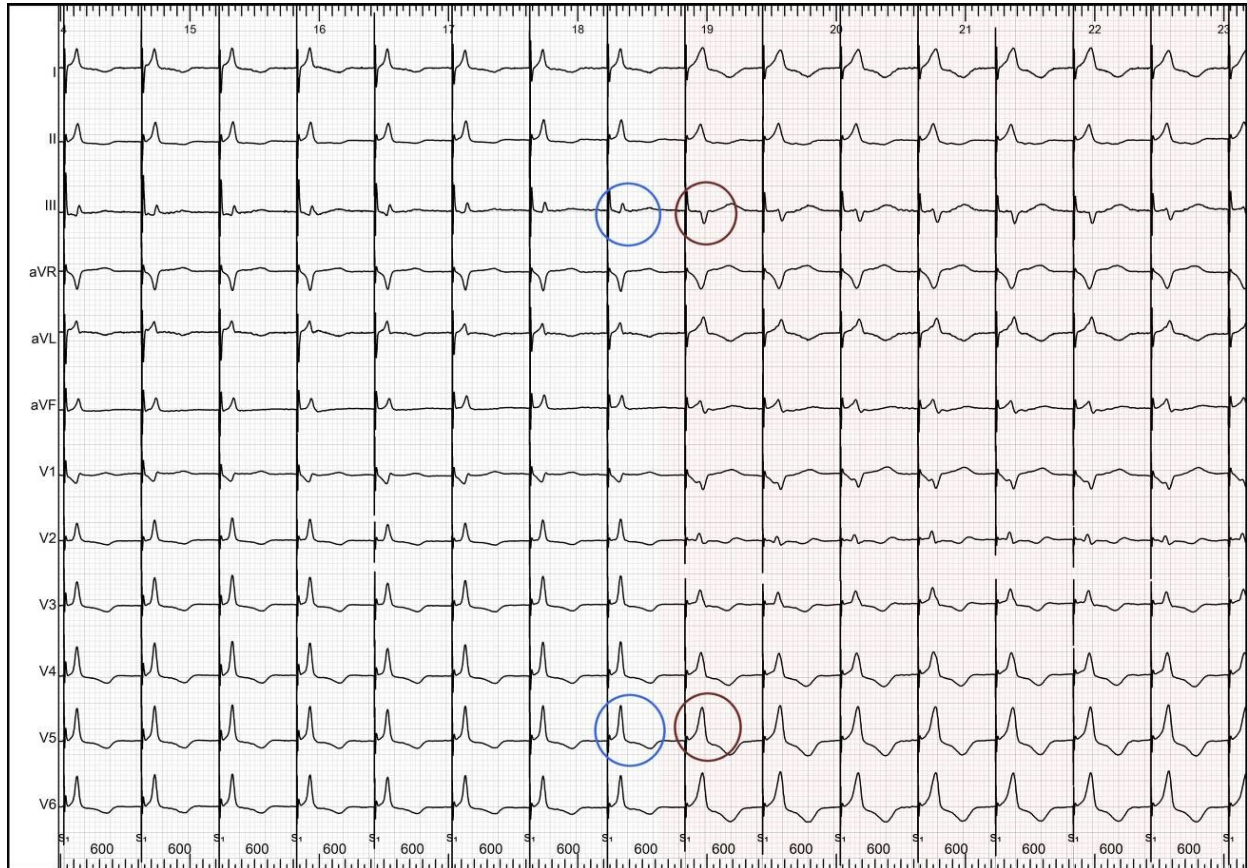

445

446 Supplementary Figure 2. A 12-lead ECG illustrating the change of ns-HB QRS morphology  
447 into RV-myocardial QRS morphology when HB capture is lost during the lowering of the  
448 pacing output (differential pacing output method). Circles mark transitions from ns-HB QRS  
449 into RV-myocardial QRS; note the change of polarity in lead III, prolongation of QRS and  
450 less spiky R wave peak in I and V4-V6.



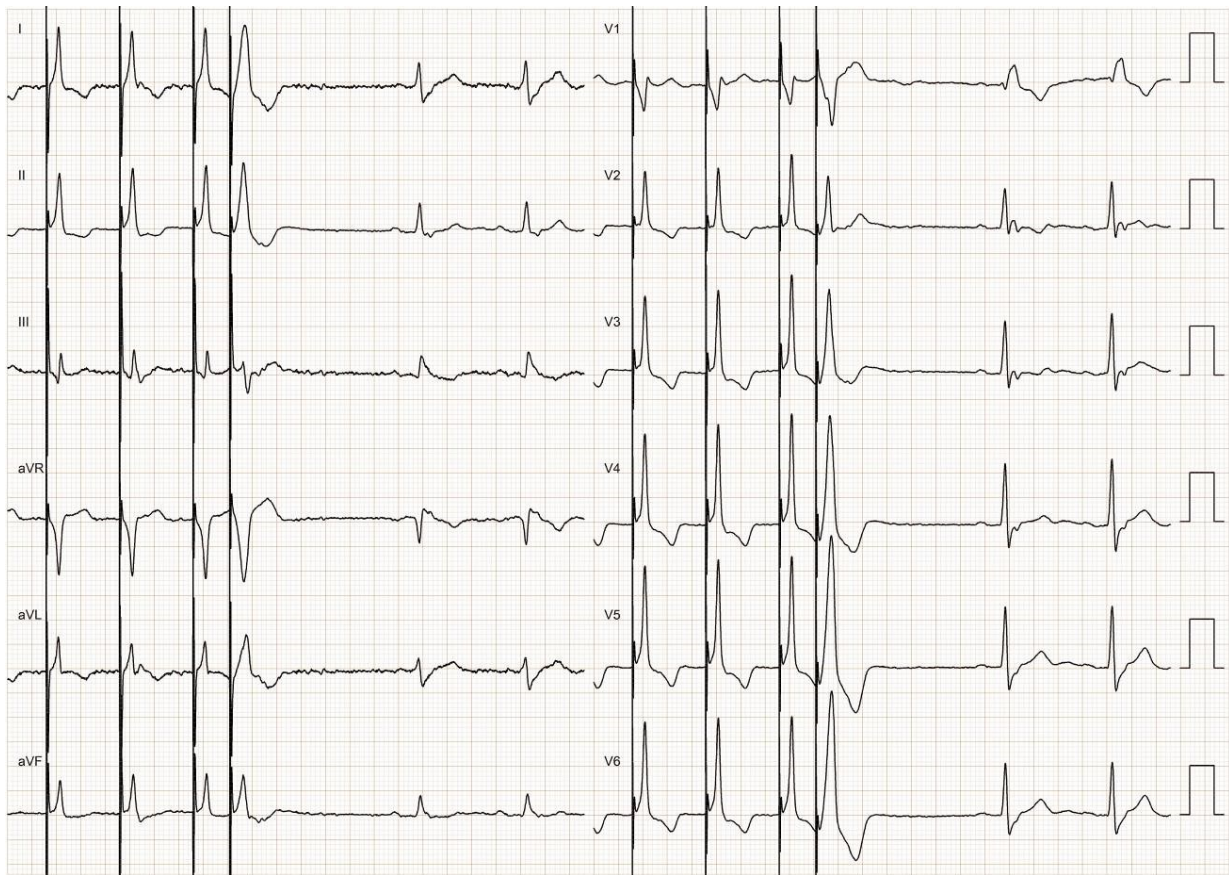

451

452   Supplementary Figure 3. Programmed His Bundle pacing: a single extra-stimulus at the  
453   coupling rate of 300 ms reveals RV-myocardial capture QRS morphology (note, QRS  
454   prolongation, appearance of a notch in V1, rounding of R wave peak in I and change of  
455   polarity in lead III). At a coupling interval of 300 ms HB, is nearly always already refractory  
456   while the RV myocardium is still not. Thus, in the majority of cases, a response diagnostic of  
457   His bundle capture during non-selective pacing can be obtained with the introduction of an  
458   extra-stimulus at a single coupling interval.

459

460
